# Supplementary material for: National Chronic Disease Management Programmes in Irish General Practice-Preparedness and Challenges
Source: MDPI journal article supplement (doi:10.3390/jpm12071157), 2022-07-17
Supplement: s1 [file s1]

## Supplementary Materials

Supplementary table S1: Overall staffing by practice location, size, and post-graduate training.

| Characteristics                | All (N=125)<br>(Mean, SD, R) | Rural (N=124)               |                            | P<br>value      | Post-graduate training centre<br>(N=120) |                            | P<br>value      | GMS patients (N=113)                 |                                  | P<br>value   |
|--------------------------------|------------------------------|-----------------------------|----------------------------|-----------------|------------------------------------------|----------------------------|-----------------|--------------------------------------|----------------------------------|--------------|
|                                |                              | Yes (N=28)<br>(Mean, SD, R) | No (N=96)<br>(Mean, SD, R) |                 | Yes (N=68)<br>(Mean, SD, R)              | No (N=52)<br>(Mean, SD, R) |                 | <=1500<br>(N=52)<br>(Mean, SD,<br>R) | >1500<br>(N=61)<br>(Mean, SD, R) |              |
| Full-time GP                   | 2.1, 1.9, 0-18               | 1.7, 1.8, 0-7               | 2.2,1.9, 0-18              | <0.05           | 2.2,1.4, 0-7                             | 1.9, 2.4, 0-18             | <0.05           | 1.2,0.7,0-3                          | 2.6,1.4, 0-7                     | 0.001        |
| Part time GP                   | 1.1, 1.3, 0-6                | 0.6, 0.9, 0-4               | 1.3,1.4, 0-6               | <0.05           | 1.1, 1.2, 0-5                            | 1.2, 1.4, 0-6              | 0.74            | 0.7,1.1,0-4                          | 1.3, 1.4, 0-6                    | <0.05        |
| <b>Total GP</b>                | <b>3.2, 2.3, 1-20</b>        | <b>2.4, 1.9, 1-8</b>        | <b>3.4, 2.4, 1-20</b>      | <b>0.001</b>    | <b>3.3, 1.7, 1-8</b>                     | <b>3.1, 2.8, 01-20</b>     | <b>0.19</b>     | <b>2.0,0.9, 1-5</b>                  | <b>4.0,1.8,1-8</b>               | <b>0.001</b> |
| Full-time GP Registrars        | 0.5, 0.6, 0-2                | 0.5, 0.7, 0-2               | 0.4, 0.6, 0-2              | 0.69            | 0.8, 0.6, 0-2                            | 0.0,0.0, 0-0               | 0.001           | 0.3,0.5,0-1                          | 0.7,0.6,0-2                      | 0.001        |
| Part-time GP Registrars        | 0.04, 0.2, 0-1               | 0.07, 0.3, 0-1              | 0.03, 0.2, 0-1             | 0.35            | 0.06, 0.2, 0-1                           | 0.02, 0.1, 0-1             | 0.29            | 0.04,0.2,0-1                         | 0.03,0.2,0-1                     | 0.88         |
| <b>Total GP Registrars</b>     | <b>0.5, 0.6, 0-2</b>         | <b>0.6, 0.7, 0-2</b>        | <b>0.4, 0.6, 0-2</b>       | <b>0.45</b>     | <b>0.9, 0.5, 0-2</b>                     | <b>0.02, 0.1, 0-1</b>      | <b>0.001</b>    | <b>0.3,0.5,0-1</b>                   | <b>0.7,0.6,0-2</b>               | <b>0.001</b> |
| Full-time Practice Nurses      | 0.9, 1.2, 0-6                | 1.1, 1.4, 0-6               | 0.9,1.2, 0-6               | 0.68            | 1.1,1.4, 0-6                             | 0.7, 0.9, 0-4              | 0.10            | 0.5,0.6, 0-2                         | 1.4, 1.5, 0-6                    | 0.001        |
| Part-time Practice Nurses      | 1.02, 1.1, 0-5               | 1.1, 1.3, 0-5               | 1.0, 1.1,0-5               | 0.92            | 1.06, 1.2, 0-5                           | 0.9, 1.1, 0-5              | 0.74            | 0.9,0.8, 0-2                         | 1.2,1.4, 0-5                     | 0.80         |
| <b>Total Practice Nurses</b>   | <b>2.0, 1.2, 0-6</b>         | <b>2.1, 1.2, 0-6</b>        | <b>1.9,1.1,0-6</b>         | <b>0.54</b>     | <b>2.2, 1.2, 1-6</b>                     | <b>1.7, 0.9, 0-5</b>       | <b>&lt;0.05</b> | <b>1.4,0.6, 0-2</b>                  | <b>2.5, 1.3, 1-6</b>             | <b>0.001</b> |
| Full-time Practice Managers    | 0.6, 0.5,0-2,                | 0.4, 0.5, 0-1               | 0.7, 0.5, 0-2              | 0.01            | 0.7, 0.5, 0-2                            | 0.5, 0.5, 0-1              | <0.05           | 0.4,0.5,0-1                          | 0.7,0.5, 0-2                     | 0.001        |
| Part-time Practice Managers    | 0.3, 0.5, 0-3                | 0.2, 0.4, 0-1               | 0.3, 0.6, 0-3              | 0.99            | 0.3, 0.5, 0-2                            | 0.2, 0.4, 0-2              | 0.27            | 0.2,0.4, 0-1                         | 0.3,0.5,0-2                      | 0.77         |
| <b>Total Practice Managers</b> | <b>0.9, 0.6, 0-4</b>         | <b>0.6, 0.5, 0-2</b>        | <b>0.9, 0.5, 0-4</b>       | <b>0.01</b>     | <b>1.03, 0.4, 0-2</b>                    | <b>0.7, 0.5, 0-2</b>       | <b>0.001</b>    | <b>0.6,0.5, 0-1</b>                  | <b>1.07, 0.4, 0-2</b>            | <b>0.001</b> |
| <b>Total other admin staff</b> | <b>3.4, 2.5, 0-15</b>        | <b>3.2, 3.3, 0-15</b>       | <b>3.5, 2.3,0-14</b>       | <b>&lt;0.05</b> | <b>3.8, 2.6, 0-15</b>                    | <b>2.9, 2.1, 0-11</b>      | <b>0.01</b>     | <b>2.3,1.3,0-6</b>                   | <b>4.5,3.0,0-15</b>              | <b>0.001</b> |
| <b>Total staff</b>             | <b>10.2, 5.7, 2-32</b>       | <b>9.2, 6.9, 3-32</b>       | <b>10.5, 5.3, 0-28</b>     | <b>&lt;0.05</b> | <b>11.3, 5.5, 3-32</b>                   | <b>8.7, 5.3, 2-27</b>      | <b>0.001</b>    | <b>6.7,2.6,2-13</b>                  | <b>13.0,6, 6-32</b>              | <b>0.001</b> |

P-values calculated using Wilcoxon rank sum test

**Supplementary table S2: Perceived barriers to implement HSE CDM programme by practice location, size, and post-graduate training.**

| Characteristics                                | Rural        |             |             |         | Postgraduate training |             |             |         | GMS patients |             |             |         |
|------------------------------------------------|--------------|-------------|-------------|---------|-----------------------|-------------|-------------|---------|--------------|-------------|-------------|---------|
|                                                | All          | Yes         | No          | P value | All                   | Yes         | No          | P value | All          | <=1500      | >1500       | P value |
| <b>Cost of additional; Doctors</b>             | <b>N=120</b> | <b>N=26</b> | <b>N=94</b> |         | <b>N=116</b>          | <b>N=64</b> | <b>N=50</b> |         | <b>N=110</b> | <b>N=50</b> | <b>N=60</b> |         |
| n (%)                                          | 69 (57.5)    | 17 (65.4)   | 52 (55.3)   | 0.49    | 64 (55.2)             | 34 (51.5)   | 30 (60.0)   | 0.47    | 62 (56.4)    | 29 (58.0)   | 33 (55.0)   | 0.90    |
| <b>Cost of additional; Practice Nurse</b>      | <b>N=123</b> | <b>N=28</b> | <b>N=95</b> |         | <b>N=119</b>          | <b>N=68</b> | <b>N=51</b> |         | <b>N=112</b> | <b>N=52</b> | <b>N=60</b> |         |
| n (%)                                          | 89 (72.4)    | 21 (75.0)   | 68 (71.6)   | 0.91    | 84 (70.6)             | 49 (72.1)   | 35 (68.6)   | 0.84    | 79 (70.5)    | 37 (71.2)   | 42 (70.0)   | 0.97    |
| <b>Cost of additional; Admin staff</b>         | <b>N=115</b> | <b>N=27</b> | <b>N=87</b> |         | <b>N=111</b>          | <b>N=86</b> | <b>N=45</b> |         | <b>N=106</b> | <b>N=49</b> | <b>N=57</b> |         |
| n (%)                                          | 71 (61.7)    | 19 (59.0)   | 52 (59.1)   | 0.41    | 66 (59.5)             | 40 (60.6)   | 26 (57.8)   | 0.92    | 63 (59.4)    | 32 (65.3)   | 31 (54.4)   | 0.34    |
| <b>Sourcing of additional; Doctors</b>         | <b>N=116</b> | <b>N=26</b> | <b>N=90</b> |         | <b>N=112</b>          | <b>N=63</b> | <b>N=49</b> |         | <b>N=107</b> | <b>N=49</b> | <b>N=58</b> |         |
| n (%)                                          | 74 (63.8)    | 19 (73.1)   | 55 (61.1)   | 0.37    | 70 (62.5)             | 38 (60.3)   | 32 (65.3)   | 0.73    | 67 (62.6)    | 32 (65.3)   | 35 (60.3)   | 0.74    |
| <b>Sourcing of additional; Practice Nurses</b> | <b>N=120</b> | <b>N=27</b> | <b>N=93</b> |         | <b>N=116</b>          | <b>N=67</b> | <b>N=49</b> |         | <b>N=109</b> | <b>N=50</b> | <b>N=59</b> |         |
| n (%)                                          | 88 (73.3)    | 22 (81.5)   | 66 (71.0)   | 0.40    | 84 (72.4)             | 50 (74.6)   | 34 (69.4)   | 0.68    | 79 (72.5)    | 39 (78.0)   | 40 (67.8)   | 0.33    |
| <b>Sourcing of additional; Admin staff</b>     | <b>N=116</b> | <b>N=26</b> | <b>N=90</b> |         | <b>N=112</b>          | <b>N=65</b> | <b>N=47</b> |         | <b>N=106</b> | <b>N=47</b> | <b>N=59</b> |         |
| n (%)                                          | 64 (55.2)    | 18 (69.2)   | 46 (51.1)   | 0.16    | 60 (53.6)             | 34 (52.3)   | 26 (55.3)   | 0.90    | 57 (53.8)    | 30 (63.8)   | 27 (45.8)   | 0.09    |
| <b>Cost of IT system</b>                       | <b>N=117</b> | <b>N=28</b> | <b>N=89</b> |         | <b>N=113</b>          | <b>N=66</b> | <b>N=47</b> |         | <b>N=106</b> | <b>N=49</b> | <b>N=57</b> |         |
| n (%)                                          | 62 (53.0)    | 16 (57.1)   | 46 (51.7)   | 0.77    | 57 (50.4)             | 34 (51.5)   | 23 (48.9)   | 0.94    | 54 (50.9)    | 23 (46.9)   | 31 (54.4)   | 0.57    |
| <b>Cost of clinical equipment's</b>            | <b>N=119</b> | <b>N=28</b> | <b>N=81</b> |         | <b>N=115</b>          | <b>N=67</b> | <b>N=48</b> |         | <b>N=108</b> | <b>N=49</b> | <b>N=59</b> |         |
| n (%)                                          | 73 (61.3)    | 20 (71.4)   | 53 (58.2)   | 0.30    | 69 (60.0)             | 38 (56.7)   | 31 (64.6)   | 0.51    | 64 (59.2)    | 32 (65.3)   | 32 (54.2)   | 0.33    |
| <b>Staff IT training</b>                       | <b>N=118</b> | <b>N=28</b> | <b>N=90</b> |         | <b>N=114</b>          | <b>N=63</b> | <b>N=51</b> |         | <b>N=108</b> | <b>N=51</b> | <b>N=57</b> |         |
| n (%)                                          | 68 (57.6)    | 15 (53.6)   | 53 (58.9)   | 0.78    | 65 (57.1)             | 30 (47.6)   | 35 (68.6)   | <0.05   | 60 (55.6)    | 35 (68.6)   | 25 (43.9)   | <0.05   |
| <b>Staff clinical equipment training</b>       | <b>N=118</b> | <b>N=28</b> | <b>N=90</b> |         | <b>N=114</b>          | <b>N=63</b> | <b>N=51</b> |         | <b>N=108</b> | <b>N=50</b> | <b>N=58</b> |         |
| n (%)                                          | 67 (56.8)    | 15 (53.6)   | 52 (57.8)   | 0.86    | 64 (56.1)             | 29 (46.0)   | 35 (68.6)   | <0.05   | 59 (54.6)    | 33 (66.0)   | 26 (44.8)   | <0.05   |
| <b>GDPR concern</b>                            | <b>N=122</b> | <b>N=28</b> | <b>N=94</b> |         | <b>N=118</b>          | <b>N=68</b> | <b>N=50</b> |         | <b>N=111</b> | <b>N=52</b> | <b>N=59</b> |         |
| n (%)                                          | 38 (31.1)    | 10 (35.7)   | 28 (29.8)   | 0.72    | 35 (29.7)             | 21 (30.9)   | 14 (28.0)   | 0.89    | 32(28.8)     | 17 (32.7)   | 15 (25.4)   | 0.53    |
| <b>IT security concern</b>                     | <b>N=122</b> | <b>N=28</b> | <b>N=94</b> |         | <b>N=118</b>          | <b>N=68</b> | <b>N=50</b> |         | <b>N=111</b> | <b>N=52</b> | <b>N=59</b> |         |
| n (%)                                          | 43 (35.2)    | 12 (42.9)   | 31 (32.9)   | 0.46    | 41 (34.7)             | 23 (33.8)   | 18 (36.0)   | 0.96    | 37(33.3)     | 20 (38.5)   | 17 (28.8)   | 0.38    |
| <b>Practice building infrastructure</b>        | <b>N=122</b> | <b>N=27</b> | <b>N=95</b> |         | <b>N=119</b>          | <b>N=68</b> | <b>N=51</b> |         | <b>N=111</b> | <b>N=52</b> | <b>N=59</b> |         |
| n (%)                                          | 84 (68.8)    | 19 (70.4)   | 65 (68.4)   | 0.99    | 80 (67.2)             | 47 (69.1)   | 33 (64.7)   | 0.76    | 75(67.6)     | 36 (69.2)   | 39 (66.1)   | 0.88    |

P-values calculated using chi-square test

**Supplementary table S3: CDM resources, and expansion of other services by practice location, size, and post-graduate training.**

[illegible]

|                                                           |                 |               |               |      |                |               |               |       |                |               |               |      |
|-----------------------------------------------------------|-----------------|---------------|---------------|------|----------------|---------------|---------------|-------|----------------|---------------|---------------|------|
| <b>CDM staff availability</b>                             | <b>(N=119)</b>  | <b>(N=28)</b> | <b>(N=91)</b> |      | <b>(N=115)</b> | <b>(N=67)</b> | <b>(N=48)</b> |       | <b>(N=108)</b> | <b>(N=49)</b> | <b>(N=59)</b> |      |
| Adequate (n, %)                                           | 84 (70.6)       | 22 (78.6)     | 62 (68.1)     | 0.41 | 80 (69.6)      | 51 (76.1)     | 29 (60.4)     | 0.11  | 77 (71.3)      | 33(67.3)      | 44 (74.6)     | 0.54 |
| Inadequate (n, %)                                         | 35 (29.4)       | 6 (21.4)      | 29 (31.9)     |      | 35 (30.4)      | 16 (23.9)     | 19 (39.6)     |       | 31 (28.7)      | 16 (32.7)     | 15 (25.4)     |      |
| <b>CDM staff training</b>                                 | <b>(N= 101)</b> | <b>(N=24)</b> | <b>(N=77)</b> |      | <b>(N=98)</b>  | <b>(N=57)</b> | <b>(N=41)</b> |       | <b>(N=93)</b>  | <b>(N=43)</b> | <b>(N=50)</b> |      |
| Adequate (n, %)                                           | 69 (68.3)       | 18 (75.0)     | 51 (66.2)     | 0.58 | 65 (66.3)      | 38 (66.7)     | 27 (65.9)     | 0.929 | 63 (67.7)      | 27 (62.8)     | 36 (72.0)     | 0.47 |
| Inadequate (n, %)                                         | 32 (31.7)       | 6 (25.0)      | 26 (33.8)     |      | 33 (33.7)      | 19 (33.3)     | 14 (34.1)     |       | 30 (32.3)      | 16(37.2)      | 14 (28.0)     |      |
| <b>CDM resource for Diabetes</b>                          |                 |               |               |      |                |               |               |       |                |               |               |      |
| <b>CDM staff availability</b>                             | <b>(N=119)</b>  | <b>(N=28)</b> | <b>(N=91)</b> |      | <b>(N=115)</b> | <b>(N=67)</b> | <b>(N=48)</b> |       | <b>(N=108)</b> | <b>(N=49)</b> | <b>(N=59)</b> |      |
| Adequate (n, %)                                           | 87 (73.1)       | 23 (82.1)     | 64 (70.3)     | 0.32 | 83 (72.2)      | 53 (79.1)     | 30 (62.5)     | 0.08  | 80 (74.0)      | 35 (71.4)     | 45 (76.3)     | 0.72 |
| Inadequate (n, %)                                         | 32 (26.9)       | 5 (17.9)      | 27 (29.7)     |      | 32 (27.8)      | 14 (20.9)     | 18 (37.5)     |       | 28 (26.0)      | 14 (28.6)     | 14 (23.7)     |      |
| <b>CDM staff training</b>                                 | <b>(N=101)</b>  | <b>(N=24)</b> | <b>(N77=)</b> |      | <b>(N=98)</b>  | <b>(N=57)</b> | <b>(N=41)</b> |       | <b>(N=93)</b>  | <b>(N=43)</b> | <b>(N=50)</b> |      |
| Adequate (n, %)                                           | 73 (72.3)       | 18 (75)       | 55 (71.4)     | 0.94 | 69 (70.4)      | 41 (71.9)     | 28 (68.3)     | 0.87  | 67 (72.0)      | 29 (67.4)     | 38 (76.0)     | 0.49 |
| Inadequate (n, %)                                         | 28 (27.7)       | 6 (25)        | 22 (28.6)     |      | 29 (29.6)      | 16 (28.1)     | 13 (31.7)     |       | 26 (28.0)      | 14 (32.6)     | 12 (24.0)     |      |
| <b>Expansion of the other programs to HSE CDM program</b> |                 |               |               |      |                |               |               |       |                |               |               |      |
| <b>Mental health</b>                                      | <b>(N=119)</b>  | <b>(N=27)</b> | <b>(N=92)</b> |      | <b>(N=115)</b> | <b>(N=68)</b> | <b>(N=47)</b> |       | <b>(N=109)</b> | <b>(N=49)</b> | <b>(N=60)</b> |      |
| Agree (n, %)                                              | 80 (67.2)       | 20 (74.1)     | 60 (65.2)     | 0.53 | 78 (67.8)      | 44 (64.7)     | 34 (72.3)     | 0.51  | 73 (67.0)      | 37 (75.5)     | 36 (60.0)     | 0.13 |
| Disagree (n, %)                                           | 39 (32.8)       | 7 (25.9)      | 32 (34.8)     |      | 37 (32.2)      | 24 (35.3)     | 13 (27.7)     |       | 36 (33.0)      | 12 (24.5)     | 24 (40.0)     |      |
| <b>Traveller health</b>                                   | <b>(N=115)</b>  | <b>(N=27)</b> | <b>(N=88)</b> |      | <b>(N=111)</b> | <b>(N=65)</b> | <b>(N=46)</b> |       | <b>(N=107)</b> | <b>(N=49)</b> | <b>(N=58)</b> |      |
| Agree (n, %)                                              | 73 (63.5)       | 19 (70.4)     | 54(61.4)      | 0.53 | 72 (64.9)      | 41 (63.1)     | 31 (67.4)     | 0.79  | 67 (62.6)      | 30 (61.2)     | 37 (63.8)     | 0.94 |
| Disagree (n, %)                                           | 42 (36.5)       | 8 (29.6)      | 34 (38.6)     |      | 39 (35.1)      | 24 (36.9)     | 15 (32.6)     |       | 40 (37.4)      | 19 (38.8)     | 21 (36.2)     |      |
| <b>Obesity</b>                                            | <b>(N=121)</b>  | <b>(N=28)</b> | <b>(N=93)</b> |      | <b>(N=117)</b> | <b>(N=68)</b> | <b>(N=49)</b> |       | <b>(N=111)</b> | <b>(N=51)</b> | <b>(N=60)</b> |      |
| Agree (n, %)                                              | 102 (84.3)      | 25 (89.3)     | 77 (82.8)     | 0.56 | 99 (84.6)      | 58 (85.3)     | 41 (83.7)     | 0.80  | 94 (84.7)      | 43 (84.3)     | 51 (85.0)     | 0.97 |
| Disagree (n, %)                                           | 19 (15.7)       | 3 (10.7)      | 16 (17.2)     |      | 18 (15.4)      | 10 (14.7)     | 8 (16.3)      |       | 17 (15.3)      | 8 (15.6)      | 9 (15.0)      |      |
| <b>Osteoporosis</b>                                       | <b>(N=116)</b>  | <b>(N=27)</b> | <b>(N=89)</b> |      | <b>(N=112)</b> | <b>(N=66)</b> | <b>(N=46)</b> |       | <b>(N=107)</b> | <b>(N=47)</b> | <b>(N=60)</b> |      |
| Agree (n, %)                                              | 88 (75.9)       | 23 (85.2)     | 65 (73.0)     | 0.30 | 85 (75.9)      | 50 (75.8)     | 35 (76.0)     | 0.92  | 81 (75.7)      | 36 (76.6)     | 45 (75.0)     | 0.94 |
| Disagree (n, %)                                           | 28 (24.1)       | 4 (14.8)      | 24 (27.0)     |      | 27 (24.1)      | 16 (24.2)     | 11 (24.0)     |       | 26 (24.3)      | 11 (23.4)     | 15 (25.0)     |      |

P-values calculated using chi-square test

**Supplementary table S4: Nearby local services and satisfaction towards waiting times by practice location, size, and post-graduate training.**

| Nearby local services       | Rural        |              |             |         | Post graduate training centres |             |             |         | GMS patients |             |             |         |
|-----------------------------|--------------|--------------|-------------|---------|--------------------------------|-------------|-------------|---------|--------------|-------------|-------------|---------|
|                             | All          | Yes          | No          | P value | All (n, %)                     | Yes         | No          | P value | All (n, %)   | <=1500 52   | >=1500 61   | P value |
| <b>Cardiac Echo</b>         | <b>N=111</b> | <b>N= 25</b> | <b>N=86</b> | 0.09    | <b>N=107</b>                   | <b>N=61</b> | <b>N=46</b> | 0.96    | <b>N=102</b> | <b>N=48</b> | <b>N=54</b> | 0.97    |
| Availability (n, %)         | 76 (68.5)    | 21(84.0)     | 55 (63.9)   |         | 73 (68.2)                      | 41 (67.2)   | 32 (69.6)   |         | 71 (69.6)    | 33 (68.7)   | 38 (70.4)   |         |
| <b>Waiting times</b>        | <b>N=103</b> | <b>N=27</b>  | <b>N=76</b> |         | <b>N=99</b>                    | <b>N=59</b> | <b>N=40</b> |         | <b>N=94</b>  | <b>N=46</b> | <b>N=48</b> |         |
| Adequate (n, %)             | 31 (30.1)    | 9 (33.3)     | 22 (28.9)   | 0.85    | 31 (31.3)                      | 20 (33.9)   | 11 (27.5)   | 0.65    | 26 (27.7)    | 12 (26.1)   | 14 (29.2)   | 0.92    |
| Inadequate (n, %)           | 72 (69.9)    | 18 (66.7)    | 54 (71.1)   |         | 68 (68.7)                      | 39 (66.1)   | 29 (72.5)   |         | 68 (72.3)    | 34 (73.9)   | 34 (70.8)   |         |
| <b>Exercise Stress Test</b> | <b>N=110</b> | <b>N=25</b>  | <b>N=85</b> | 0.74    | <b>N=106</b>                   | <b>N=61</b> | <b>N=45</b> | 0.07    | <b>N=101</b> | <b>N=48</b> | <b>N=53</b> | 0.70    |
| Availability (n, %)         | 83 (75.4)    | 20 (80.0)    | 63 (74.1)   |         | 79 (74.5)                      | 41 (67.2)   | 38 (84.4)   |         | 75 (74.3)    | 37 (77.1)   | 38 (71.2)   |         |
| <b>Waiting times</b>        | <b>N=106</b> | <b>N=27</b>  | <b>N=79</b> |         | <b>N=102</b>                   | <b>N=58</b> | <b>N=44</b> |         | <b>N=96</b>  | <b>N=49</b> | <b>N=47</b> |         |
| Adequate (n, %)             | 21 (19.8)    | 8 (29.6)     | 13 (16.4)   | 0.30    | 20 (19.6)                      | 14 (24.1)   | 6 (13.6)    | 0.28    | 19 (19.8)    | 8 (16.3)    | 11 (23.4)   | 0.54    |
| Inadequate (n, %)           | 85 (80.2)    | 19 (70.4)    | 66 (83.6)   |         | 82 (80.4)                      | 44 (75.9)   | 38 (86.4)   |         | 77 (80.2)    | 41 (83.7)   | 36 (76.6)   |         |
| <b>Physiotherapy</b>        | <b>N=113</b> | <b>N=25</b>  | <b>N=88</b> | 0.96    | <b>N=109</b>                   | <b>N=62</b> | <b>N=47</b> | 0.92    | <b>N=104</b> | <b>N=49</b> | <b>N=55</b> | 0.47    |
| Availability (n, %)         | 112 (99.1)   | 25 (100)     | 87 (98.9)   |         | 108 (99.1)                     | 61 (98.4)   | 47 (100)    |         | 103 (99.1)   | 48 (97.9)   | 55 (100)    |         |
| <b>Waiting times</b>        | <b>N=119</b> | <b>N=27</b>  | <b>N=92</b> |         | <b>N=115</b>                   | <b>N=67</b> | <b>N=48</b> |         | <b>N=109</b> | <b>N=51</b> | <b>N=58</b> |         |
| Adequate (n, %)             | 31 (26.1)    | 11 (40.7)    | 20 (21.7)   | 0.08    | 30 (26.1)                      | 19 (28.4)   | 11 (22.9)   | 0.66    | 29 (26.6)    | 12 (23.5)   | 17 (29.3)   | 0.64    |
| Inadequate (n, %)           | 88 (73.9)    | 16 (59.3)    | 72 (78.3)   |         | 85 (73.9)                      | 48 (71.6)   | 37 (77.1))  |         | 80 (73.4)    | 39 (76.5)   | 41 (70.7)   |         |
| <b>Dietician</b>            | <b>N=113</b> | <b>N=25</b>  | <b>N=88</b> | 0.07    | <b>N=109</b>                   | <b>N=62</b> | <b>N=47</b> | 0.39    | <b>N=104</b> | <b>N=49</b> | <b>N=55</b> | 0.25    |
| Availability (n, %)         | 100 (88.5)   | 25 (100)     | 75 (85.3)   |         | 96 (88.1)                      | 53 (48.6)   | 43 (39.4)   |         | 91 (87.5)    | 45 (91.8)   | 46 (83.6)   |         |
| <b>Waiting times</b>        | <b>N=113</b> | <b>N=27</b>  | <b>N=86</b> |         | <b>N=109</b>                   | <b>N=62</b> | <b>N=47</b> |         | <b>N=103</b> | <b>N=50</b> | <b>N=53</b> |         |
| Adequate (n, %)             | 28 (24.8)    | 8 (29.6)     | 20 (23.3)   | 0.68    | 27 (24.8)                      | 15 (24.2)   | 12 (25.5)   | 0.92    | 25 (24.3)    | 13 (26.0)   | 12 (22.6)   | 0.87    |
| Inadequate (n, %)           | 85 (75.2)    | 19 (70.4)    | 66 (76.7)   |         | 82 (75.2)                      | 47 (75.8)   | 35 (74.5)   |         | 78 (75.7)    | 37 (74.0)   | 41 (77.4)   |         |
| <b>Retinal screening</b>    | <b>N=111</b> | <b>N=25</b>  | <b>N=86</b> | 0.51    | <b>N=107</b>                   | <b>N=61</b> | <b>N=46</b> | 0.92    | <b>N=102</b> | <b>N=48</b> | <b>N=54</b> | 0.47    |
| Availability (n, %)         | 110 (99.1)   | 24 (96.0)    | 86 (100)    |         | 106 (99.1)                     | 60 (98.4)   | 46 (100)    |         | 101 (99.1)   | 47 (97.9)   | 54 (100)    |         |
| <b>Waiting times</b>        | <b>N=118</b> | <b>N=27</b>  | <b>N=91</b> |         | <b>N=114</b>                   | <b>N=66</b> | <b>N=48</b> |         | <b>N=108</b> | <b>N=51</b> | <b>N=57</b> |         |
| Adequate (n, %)             | 93 (78.8)    | 20 (74.1)    | 73 (80.2)   | 0.67    | 91 (79.8)                      | 54 (81.8)   | 37 (77.1)   | 0.70    | 88 (81.5)    | 40 (78.4)   | 48 (84.2)   | 0.60    |
| Inadequate (n, %)           | 25 (21.2)    | 7 (25.9)     | 18 (19.8)   |         | 23 (20.2)                      | 12 (18.2)   | 11 (22.9)   |         | 20 (18.5)    | 11 (21.6)   | 9 (15.8)    |         |
| <b>Smoking cessation</b>    | <b>N=109</b> | <b>N=25</b>  | <b>N=84</b> | 0.69    | <b>N=105</b>                   | <b>N=59</b> | <b>N=46</b> | 0.73    | <b>N=100</b> | <b>N=47</b> | <b>N=53</b> | 0.91    |
| Availability (n, %)         | 99 (90.8)    | 22 (88.0)    | 77 (91.7)   |         | 96 (91.4)                      | 53 (89.8)   | 43 (93.5)   |         | 92 (100)     | 43 (91.5)   | 49 (92.5)   |         |
| <b>Waiting times</b>        | <b>N=111</b> | <b>N=25</b>  | <b>N=86</b> |         | <b>N=108</b>                   | <b>N=61</b> | <b>N=47</b> |         | <b>N=103</b> | <b>N=47</b> | <b>N=54</b> |         |
| Adequate (n, %)             | 59 (53.2)    | 14 (56.0)    | 45 (52.3)   | 0.92    | 58 (53.7)                      | 32 (52.5)   | 26 (55.3)   | 0.92    | 57 (55.3)    | 27 (55.1)   | 30 (55.6)   | 0.98    |
| Inadequate (n, %)           | 52 (46.8)    | 11 (44.0)    | 41 (47.7)   |         | 50 (46.3)                      | 29 (47.5)   | 21 (44.7)   |         | 46 (44.7)    | 22 (44.9)   | 24 (44.4)   |         |

P-values calculated using chi-square test

**Supplementary figure S1: Overall staffing by practice location, size, and post-graduate training.**

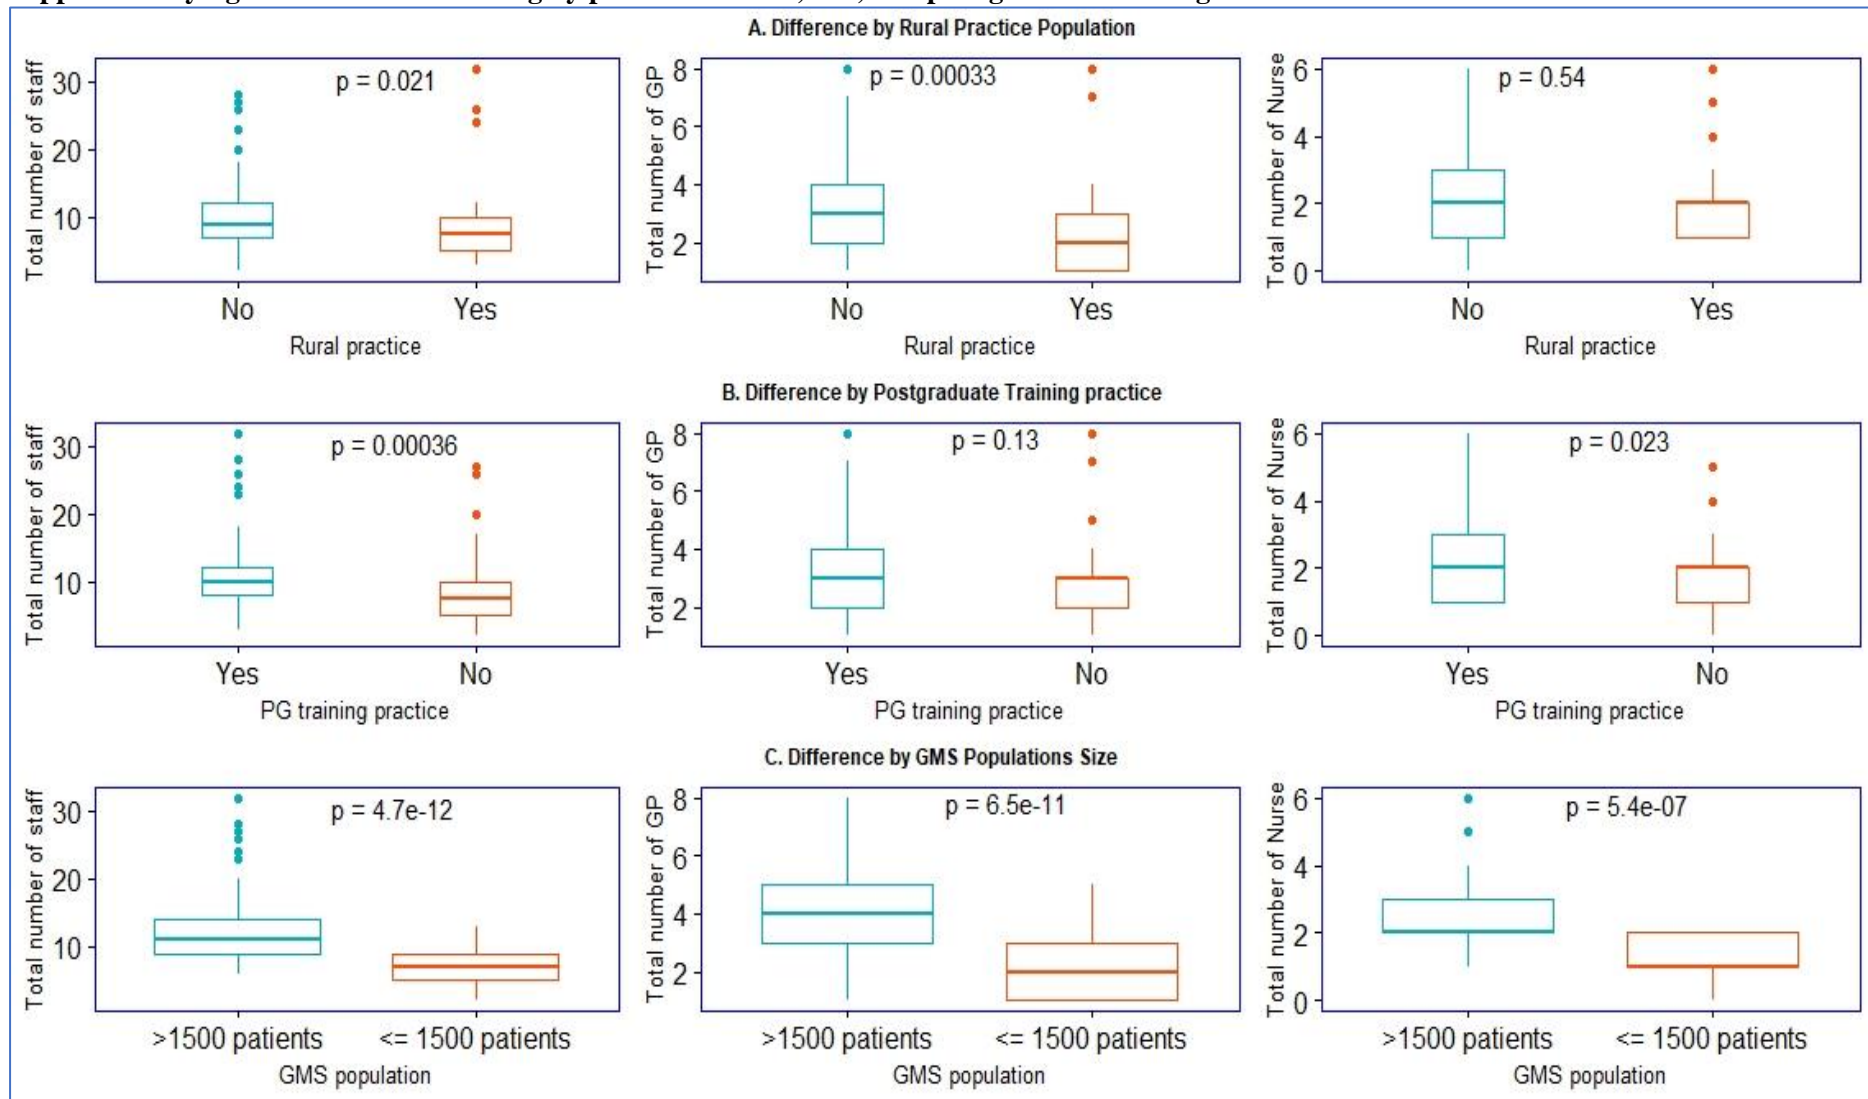

Note: \*p-value significant at  $P < 0.05$ .
